# Supplementary material
Source: PubMed Central journal article supplement (PMC6016839)
Supplement: NIHMS975633-supplement-Supplementary_File.pdf [file NIHMS975633-supplement-Supplementary_File.pdf]

In the format provided by the authors and unedited.

# Stability of the human faecal microbiome in a cohort of adult men

Raaj S. Mehta<sup>1,2</sup>, Galeb S. Abu-Ali <sup>3,4</sup>, David A. Drew <sup>1,2</sup>, Jason Lloyd-Price <sup>3,4</sup>,  
Ayshwarya Subramanian <sup>3,4</sup>, Paul Lochhead<sup>1,2</sup>, Amit D. Joshi<sup>1,2</sup>, Kerry L. Ivey<sup>5,6</sup>, Hamed Khalili<sup>1,2</sup>,  
Gordon T. Brown<sup>1,2</sup>, Casey DuLong<sup>3</sup>, Mingyang Song<sup>1,2</sup>, Long H. Nguyen<sup>1,2</sup>, Himel Mallick <sup>3,4</sup>,  
Eric B. Rimm<sup>5,7</sup>, Jacques Izard <sup>8</sup>, Curtis Huttenhower <sup>3,4\*</sup> and Andrew T. Chan <sup>1,2,7\*</sup>

<sup>1</sup>Clinical and Translational Epidemiology Unit, Massachusetts General Hospital and Harvard Medical School, Boston, MA, USA. <sup>2</sup>Division of Gastroenterology, Massachusetts General Hospital and Harvard Medical School, Boston, MA, USA. <sup>3</sup>Biostatistics Department, Harvard T. H. Chan School of Public Health, Boston, MA, USA. <sup>4</sup>The Broad Institute, Cambridge, MA, USA. <sup>5</sup>Department of Nutrition, Harvard T. H. Chan School of Public Health, Boston, MA, USA. <sup>6</sup>South Australian Health and Medical Research Institute, Infection and Immunity Theme, School of Medicine, Flinders University, Adelaide, Australia. <sup>7</sup>Channing Division of Network Medicine, Brigham and Women's Hospital, Boston, MA, USA. <sup>8</sup>University of Nebraska, Lincoln, NE, USA. Raaj S. Mehta, Galeb S. Abu-Ali, Curtis Huttenhower and Andrew T. Chan contributed equally to this work. \*e-mail: [chuttenh@hsph.harvard.edu](mailto:chuttenh@hsph.harvard.edu); [achan@mgh.harvard.edu](mailto:achan@mgh.harvard.edu)

## Supplementary Information for “Stability of the Human Fecal Microbiome in a Cohort of Adult Men”

Raaj S. Mehta<sup>a,b,1</sup>, Galeb S. Abu-Ali<sup>c,d,1</sup>, David A. Drew<sup>a,b</sup>, Jason Lloyd-Price<sup>c,d</sup>, Ayshwarya Subramanian<sup>c,d</sup>, Paul Lochhead<sup>a,b</sup>, Amit D. Joshi<sup>a,b</sup>, Kerry L. Ivey<sup>e,g</sup>, Hamed Khalili<sup>a,b</sup>, Gordon T. Brown<sup>a,b</sup>, Casey DuLong<sup>c</sup>, Mingyang Song<sup>a,b</sup>, Long H. Nguyen<sup>a,b</sup>, Himel Mallick<sup>c,d</sup>, Eric B. Rimm<sup>e,h</sup>, Jacques Izard<sup>f</sup>, Curtis Huttenhower<sup>c,d,h,2</sup>, Andrew T. Chan<sup>a,b,h,2</sup>

<sup>a</sup> Clinical and Translational Epidemiology Unit, <sup>b</sup> Division of Gastroenterology, Massachusetts General Hospital and Harvard Medical School, 55 Fruit Street, Boston, MA 02114; <sup>c</sup> Biostatistics Department and <sup>e</sup> Department of Nutrition, Harvard T. H. Chan School of Public Health, 677 Huntington Avenue, Boston, MA 02115; <sup>d</sup> The Broad Institute, 7 Cambridge Center, Cambridge, MA 02142; <sup>f</sup> University of Nebraska, 1901 North 21 Street, Lincoln, NE 68588; <sup>g</sup> South Australian Health and Medical Research Institute, Infection and Immunity Theme, School of Medicine, Flinders University, Adelaide, Australia, 5000; <sup>h</sup> Channing Division of Network Medicine, Brigham and Women’s Hospital, 181 Longwood Avenue, Boston, MA, 02115

<sup>1</sup> R.S.M. and G.S.A. contributed equally to this work.

<sup>2</sup> C.H. and A.T.C. contributed equally to this work. To whom correspondence should be addressed:

Andrew T. Chan, MD, MPH  
Clinical and Translational Epidemiology Unit  
Massachusetts General Hospital  
55 Fruit Street  
Boston, MA 02114  
Telephone: 617-726-7802  
Fax: 617-726-3673  
Email: [achan@mgh.harvard.edu](mailto:achan@mgh.harvard.edu)

Curtis Huttenhower, PhD  
Biostatistics Department  
Harvard T.H. Chan School of Public Health  
677 Huntington Avenue  
Boston, MA 02115  
Telephone: 617-432-4912  
[chuttenh@hsph.harvard.edu](mailto:chuttenh@hsph.harvard.edu)

## Supplementary discussion

Stool samples for this study were collected following a previously-established protocol involving delivery of sample material fixed in RNAlater to the laboratory.<sup>1</sup> Analyses from our pilot study demonstrated that two-day simulated shipping of RNAlater-fixed stool aliquots had only a minimal perturbative effect on the gut metagenome and metatranscriptome when compared to fresh-frozen sample collection protocols.<sup>1</sup> Since publication of our pilot work, other studies have confirmed no significant effect of RNAlater on community composition.<sup>2,3</sup> One study, however, has suggested differences in evenness in microbial taxonomic composition in stool stored in RNAlater compared to -80 °C controls.<sup>4</sup> Notably, variation attributable to storage method was markedly smaller than the variation explained by different sample time points. Furthermore, variation attributed to RNAlater relative to freezing at -80°C, was comparable to that introduced by sample storage in OMNIGene.Gut, another popular sample stabilization kit. Taken together, the effect of RNAlater on microbiome sample composition is local, of very small effect when significant at all, and no greater than that of any other currently used sample stabilization method.

Supplementary Figure 1: Ordination plot of taxonomic profiles (n=929). 8 outliers (samples) were removed. 4 of these came from one person who reported a colectomy at the time of participation in the study.

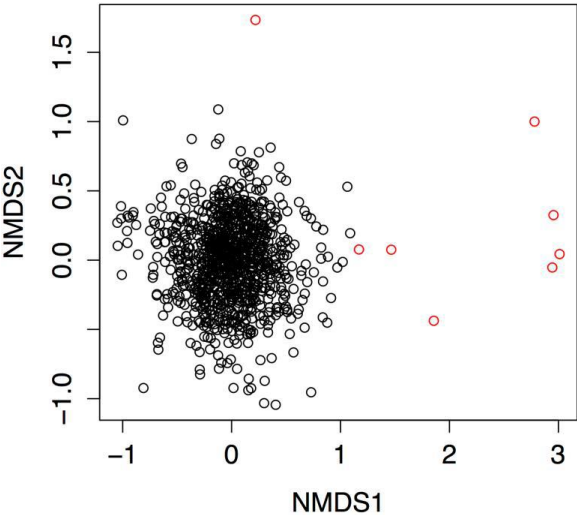

Supplementary Table 1. Reliability in measuring relative abundance levels over short-term (24-72 hours) and long-term (~6 months) intervals for the majority of species and gene families. Genes were most highly repeatable, followed by species, and then distantly followed by RNA pathways. An ICC of <0.40 suggests poor repeatability, 0.40 to 0.75 indicates fair to good repeatability, and  $\geq 0.75$  indicates excellent repeatability<sup>49</sup>.

|                 | <b>Percent of features with an ICC &gt; 0.40</b> |                  |
|-----------------|--------------------------------------------------|------------------|
|                 | <u>Short-term</u>                                | <u>Long-Term</u> |
| Species (n=146) | 96.8%                                            | 86.8%            |
| DNA (n=1951)    | 99.9%                                            | 92.8%            |
| RNA (n=3566)    | 1.3%                                             | 0.79%            |

## References

1. Franzosa, E. A. *et al.* Relating the metatranscriptome and metagenome of the human gut. *Proc. Natl. Acad. Sci. U. S. A.* **111**, E2329–2338 (2014).
2. Song, S. J. *et al.* Preservation Methods Differ in Fecal Microbiome Stability, Affecting Suitability for Field Studies. *mSystems* **1**, (2016).
3. Voigt, A. Y. *et al.* Temporal and technical variability of human gut metagenomes. *Genome Biol.* **16**, 73 (2015).
4. Choo, J. M., Leong, L. E. X. & Rogers, G. B. Sample storage conditions significantly influence faecal microbiome profiles. *Sci Rep* **5**, 16350 (2015).
